# Supplementary material for: Mass Spectrometric ITEM-ONE and ITEM-TWO Analyses Confirm and Refine an Assembled Epitope of an Anti-Pertuzumab Affimer
Source: Biomolecules. 2023 Dec 24;14(1):24. doi: 10.3390/biom14010024 (PMC10813730; doi:10.3390/biom14010024)
Supplement: Supplementary file 1 [file biomolecules-14-00024-s001.zip › biomolecules-2697210-supplementary.pdf]

# **Mass spectrometric ITEM-ONE and ITEM-TWO Analyses Confirm and Refine an Assembled Epitope of an anti-Pertuzumab Affimer**

Claudia Röwer <sup>1</sup>, Oladapo Olaleye <sup>2</sup>, Rainer Bischoff <sup>2</sup>, and Michael O. Glocker <sup>1,#</sup>

1) Proteome Center Rostock, Medical Faculty and Natural Science Faculty, University of Rostock,  
Schillingallee 69, 18057 Rostock, Germany

2) Department of Analytical Biochemistry, Faculty of Science & Engineering, University of  
Groningen, Antonius Deusinglaan 1, 9713 AV Groningen, The Netherlands

## **Supplement**

# to whom correspondence may be addressed

Michael O. Glocker, Proteome Center Rostock, University of Rostock,  
Schillingallee 69, D-18057 Rostock, Germany.

Phone: +49-381-494 4930

Fax: +49-381-494 4932

E-Mail: michael.glocker@med.uni-rostock.de

## Supplemental Figures

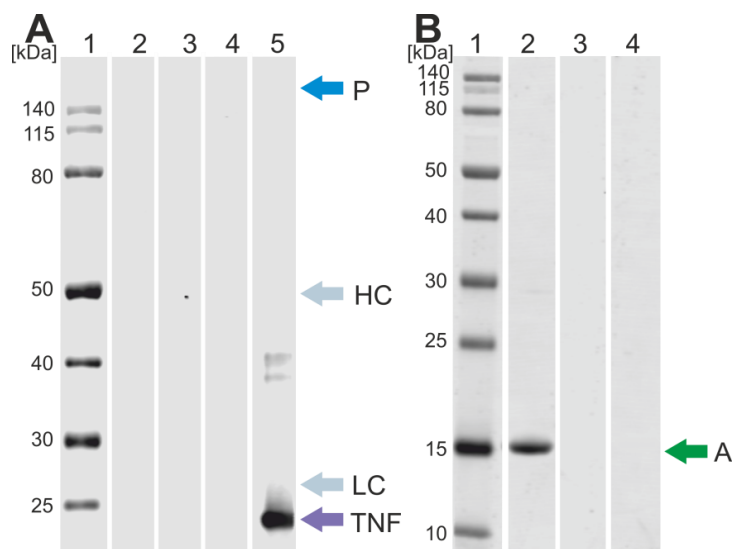

**Figure S1:** Western blot analyses of the anti-Pertuzumab affimer 00557\_709097 binding to Pertuzumab.

**A:** Prestained protein ladder (PageRuler Prestained Protein Ladder; 3  $\mu$ l) as apparent molecular mass marker (lane 1). Apparent molecular masses are shown at the left. 2.88  $\mu$ g of intact Pertuzumab (lane 2); 5.28  $\mu$ g of reduced and alkylated Pertuzumab (lanes 3 and 4) were loaded. 1.2  $\mu$ g of His-tag labeled rhTNF $\alpha$  (lane 5) were loaded. The anti-Pertuzumab affimer 00557\_709097 was used as primary antibody and serves as His-tag carrying binder. An anti-His-tag antibody from mouse (BioRad) was used as secondary antibody. An anti-mouse antibody from goat labelled with IRDye $\text{\textcircled{R}}$  800 was added for visualization. The location of intact Pertuzumab (lane 2; P), of heavy chains and light chains (lanes 3 and 4; HC and LC) are indicated by blueish arrows on the right. The location of the rhTNF $\alpha$  monomer is indicated by the purple arrow (lane 5; TNF).

**B:** Prestained protein ladder (PageRuler Prestained Protein Ladder; 3  $\mu$ l) as apparent molecular mass marker (lane 1) and anti-Pertuzumab affimer 00557\_709097 (3  $\mu$ g per lane) were loaded on an SDS polyacrylamide gel (lanes 2-4). Upon addition of primary and secondary antibodies, proteins were visualized as bands. **Lane 1:** Prestained protein ladder. Apparent molecular masses are shown at the left. **Lane 2:** Pertuzumab (1.5  $\mu$ g/ml) was used as primary antibody and anti-human antibody from goat labelled with IRDye $\text{\textcircled{R}}$  800 was applied as secondary antibody. **Lane 3:** The primary antibody was omitted but anti-human antibody from goat labelled with IRDye $\text{\textcircled{R}}$  800 was added as secondary antibody (blank). **Lane 4:** Trastuzumab (1.5  $\mu$ g/ml) was used as primary antibody and anti-human antibody from goat labelled with IRDye $\text{\textcircled{R}}$  800 was added as secondary antibody (negative control). The green arrow on the right points to the location of the anti-Pertuzumab affimer 00557\_709097 (A) in the gel. The blot images have been cropped above 180 kDa and below 10 kDa, respectively.

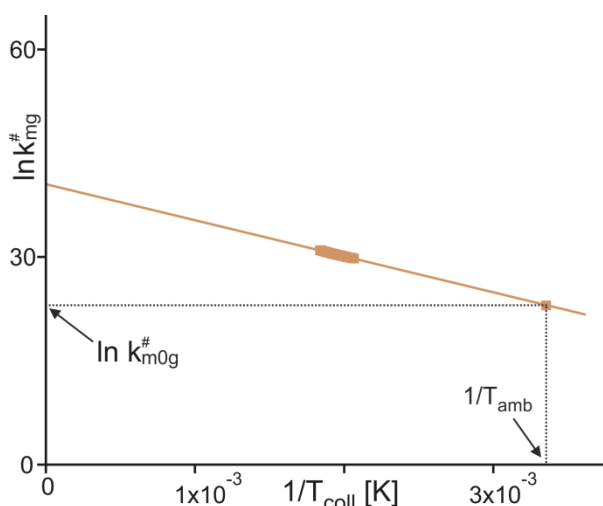

**Figure S2:** Arrhenius plot for the gas phase complex dissociation reaction of the anti-Pertuzumab affimer 00557\_709097 bound to Pertuzumab.

Each data point (thickened part of the line) has been obtained from the linear part of the Boltzmann curve and the resulting line has been extrapolated in both directions. The value for  $\ln k^{\#}_{D m0g}$  corresponds to  $1/T_{amb}$ . Calculated kinetic values are listed in Table 3.

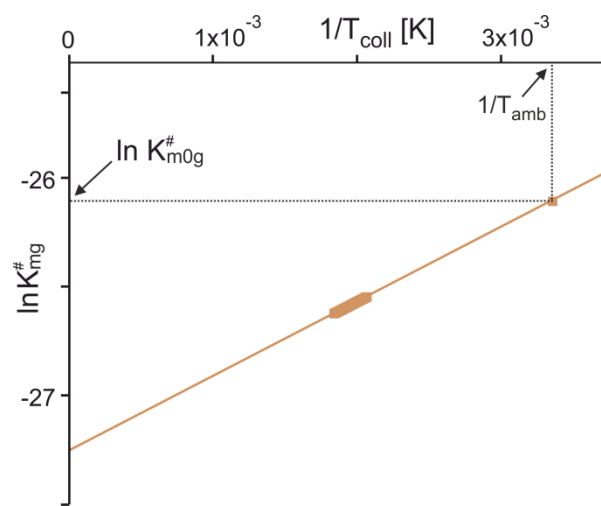

**Figure S3:** Gibbs-Helmholtz plot for the gas phase complex dissociation reaction of the anti-Pertuzumab affimer 00557\_709097 bound to Pertuzumab.

Each data point (thickened part of the line) has been obtained from the linear part of the Boltzmann curve and the resulting line has been extrapolated in both directions. The value for  $\ln k^{\#}_{D m0g}$  corresponds to  $1/T_{amb}$ . Calculated thermodynamic values are listed in Table 3.

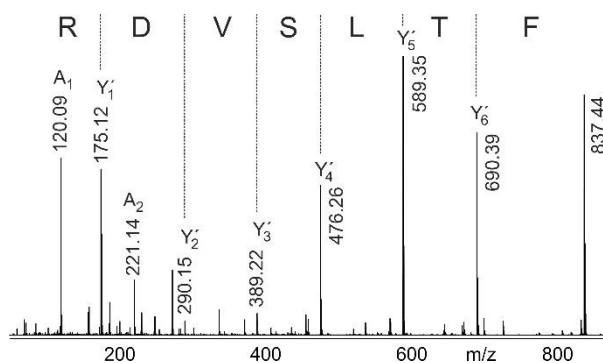

**Figure S4:** NanoESI mass spectrum of by CID fragmented peptide FTLSDVR from the tryptic Pertuzumab peptide mixture. Ion signals are labelled with  $m/z$  values and fragment assignment using the nomenclature suggested by Fohlman and Roepstorff. The determined amino acid sequence of the precursor peptide with  $m/z$  837.44 is shown in reverse order on top.

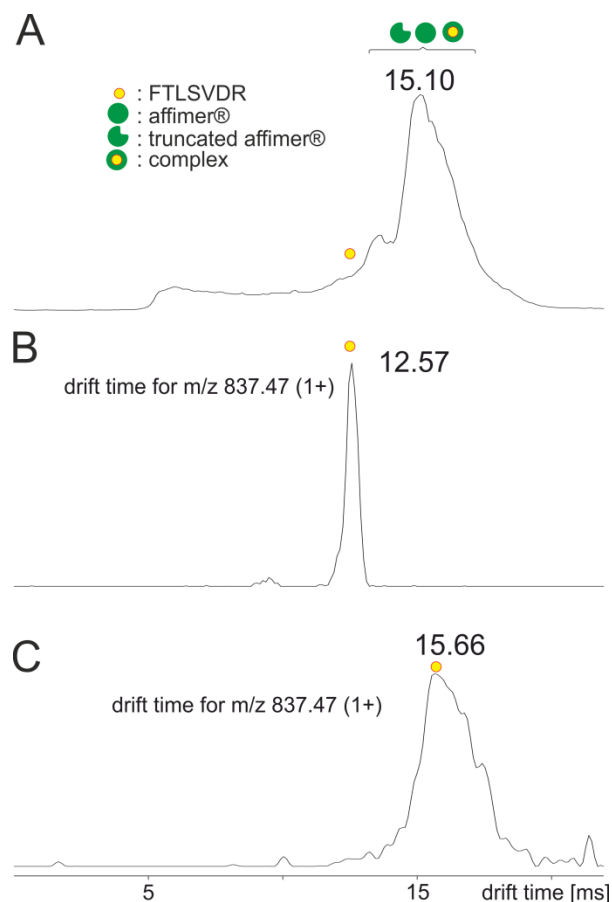

**Figure S5:** Ion mobility drift time plot of the tryptic peptide mixture from Pertuzumab incubated with the anti-Pertuzumab affimer 00557\_709097. Drift times are given for ions from the anti-Pertuzumab affimer 00557\_709097 (monomeric full-length affimer (green filled circle, **I**), the monomeric truncated affimer (green filled circle with rectangular cutout, **III**), and for peptide FTLSDVR (amino acid range 68-74 from Pertuzumab heavy chain (HC); yellow filled circle). Complex ion signals are indicated with yellow filled circles centered within green filled circles. Traces were smoothed using the Savitzky Golay algorithm applying a smooth window of 2 channels and 2 smooth cycles. **A:** Drift time plot for all ions at Transfer collision cell voltage difference of 2V. **B:** Drift time plot for ion with  $m/z$  value of 837.47 (singly protonated FTLSDVR peptide) at Transfer collision cell voltage difference of 2 V. **C:** Drift time plot for ion with  $m/z$  value 837.47 at Transfer collision cell voltage difference of 200 V.

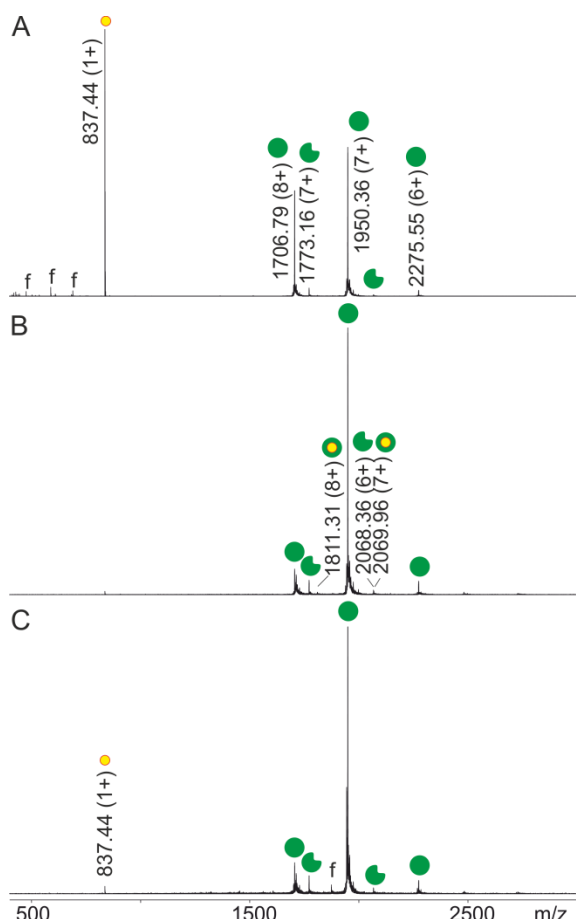

**Figure S6:** Offline nanoESI mass spectra of the FTLSVDR peptide from the Pertuzumab heavy chain incubated with the anti-Pertuzumab affimer 00557\_709097.

The molar ratio of anti-Pertuzumab affimer 00557\_709097 to the FTLSVDR peptide was 1 to 2. Selected m/z values and charge states of ion signals are given for the anti-Pertuzumab affimer 00557\_709097 (monomeric full-length affimer (green filled circle, I) and monomeric truncated affimer (green filled circle with rectangular cutout, III), and for peptide FTLSVDR (amino acid range 68-74 from Pertuzumab heavy chain (HC); yellow filled circle). Complex ion signals are indicated with yellow filled circles centered within green filled circles. f: known peptide or affimer fragment ion signals. Solvent: 200 mM ammonium acetate, pH 6.7. Spectra were smoothed using the Savitzky Golay algorithm applying a smooth window of 10 channels and 20 numbers of smooth cycles. **A:** The quadrupole was set to full transmission of all ions and the Trap collision cell voltage difference was set to 2 V. **B:** The quadrupole was set to block transmission of ions < m/z 1650 and the Trap collision cell voltage difference was set to 2 V. **C:** The quadrupole was set to block transmission of ions < m/z 1650 and the Trap collision cell voltage difference was set to 40 V.

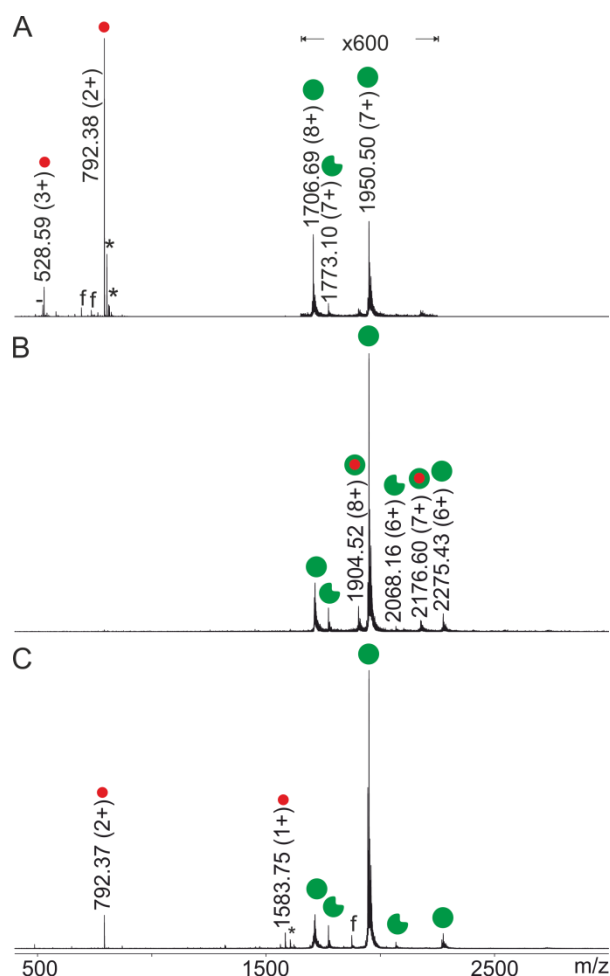

**Figure S7:** Offline nanoESI mass spectra of the NSGGSINQRFKGR peptide from the Pertuzumab heavy chain incubated with the anti-Pertuzumab affimer 00557\_709097.

The molar ratio of anti-Pertuzumab affimer 00557\_709097 to the FTLSVDR peptide was 1 to 2. Selected m/z values and charge states of ion signals are given for the anti-Pertuzumab affimer 00557\_709097 (monomeric full-length affimer (green filled circle, I) and monomeric truncated affimer (green filled circle with rectangular cutout, III), and for peptide NSGGSINQRFKGR (amino acid range 54-67 from Pertuzumab heavy chain (HC); red filled circle). Complex ion signals are indicated with red filled circles centered within green filled circles. f: known peptide or affimer fragment ion signals. \*: sodium and/or potassium adducts, -: loss of NH<sub>2</sub>. Solvent: 200 mM ammonium acetate, pH 6.7. Spectra were smoothed using the Savitzky Golay algorithm applying a smooth window of 10 channels and 20 numbers of smooth cycles. Ion signal multiplication factors are given. **A:** The quadrupole was set to full transmission of all ions and the Trap collision cell voltage difference was set to 2 V. **B:** The quadrupole was set to block transmission of ions < m/z 1650 and the Trap collision cell voltage difference was set to 2 V. **C:** The quadrupole was set to block transmission of ions < m/z 1650 and the Trap collision cell voltage difference was set to 40 V.

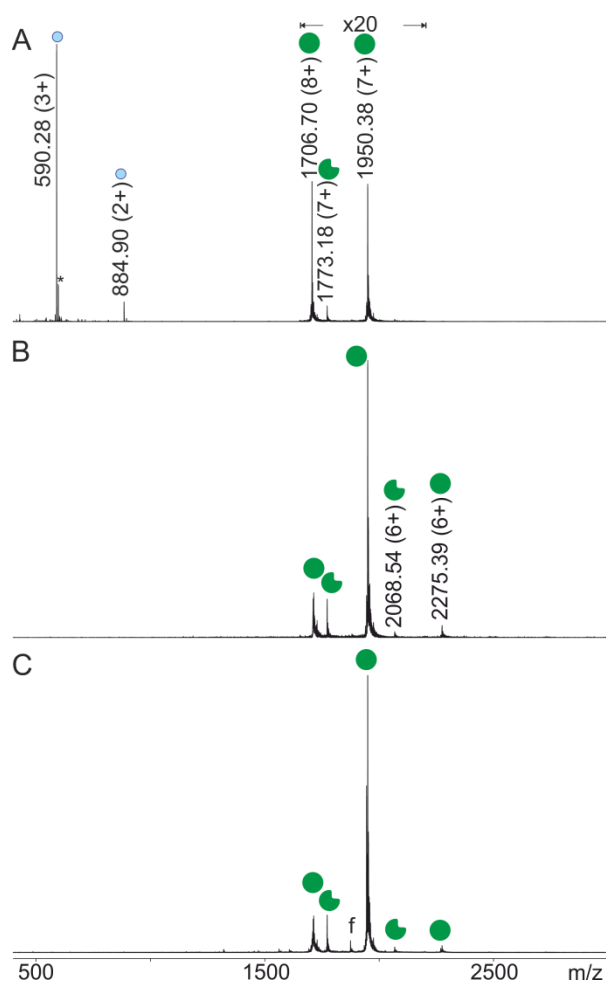

**Figure S8:** Offline nanoESI mass spectra of the GSSHHHHHHSSGLVPR His-tag peptide incubated with the anti-Pertuzumab affimer 00557\_709097. The molar ratio of anti-Pertuzumab affimer 00557\_709097 to the GSSHHHHHHSSGLVPR peptide was 1 to 2. Selected  $m/z$  values and charge states of ion signals are given for the anti-Pertuzumab affimer 00557\_709097 (monomeric full-length affimer (green filled circle, **I**) and monomeric truncated affimer (green filled circle with rectangular cutout, **III**), and for peptide GSSHHHHHHSSGLVPR (light blue filled circle). f: known peptide or affimer fragment ion signals. \*: sodium and/or potassium adducts. Solvent: 200 mM ammonium acetate, pH 6.7. Spectra were smoothed using the Savitzky Golay algorithm applying a smooth window of 10 channels and 20 numbers of smooth cycles. **A:** The quadrupole was set to full transmission of all ions and the Trap collision cell voltage difference was set to 2 V. **B:** The quadrupole was set to block transmission of ions  $< m/z$  1650 and the Trap collision cell voltage difference was set to 2 V. **C:** The quadrupole was set to block transmission of ions  $< m/z$  1650 and the Trap collision cell voltage difference was set to 40 V.

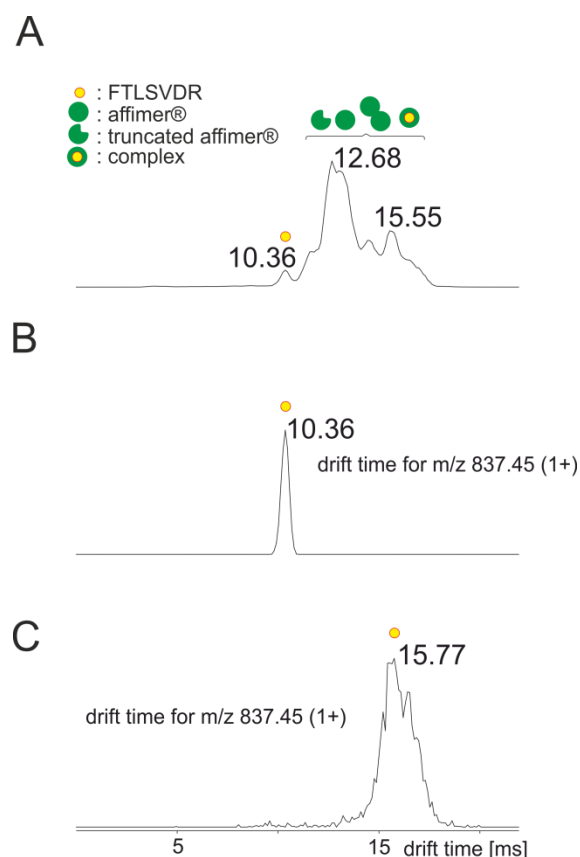

**Figure S9:** Ion mobility drift time plot of the FTLSVDR peptide incubated with the anti-Pertuzumab affimer 00557\_709097.

The molar ratio of anti-Pertuzumab affimer 00557\_709097 to the FTLSVDR peptide from the Pertuzumab heavy chain was 1 to 2. Drift times are given for ions from the anti-Pertuzumab affimer 00557\_709097 (monomeric full-length affimer (green filled circle, **I**), the dimeric full-length affimer (green filled circle tandem, **II**), and the monomeric truncated affimer (green filled circle with rectangular cutout, **III**), and for peptide FTLSVDR (amino acid range 68-74 from Pertuzumab heavy chain (HC); yellow filled circle). Complex ions are indicated with yellow filled circles centered within green filled circles. Traces were smoothed using the Savitzky Golay algorithm applying a smooth window of 2 channels and 2 smooth cycles. **A:** Drift time plot for all ions at Transfer collision cell voltage difference of 2V. **B:** Drift time plot for the ion with  $m/z$  value of 837.47 (singly protonated FTLSVDR peptide) at Transfer collision cell voltage difference of 2 V. **C:** Drift time plot for ion with  $m/z$  value 837.47 at Transfer collision cell voltage difference of 75 V.

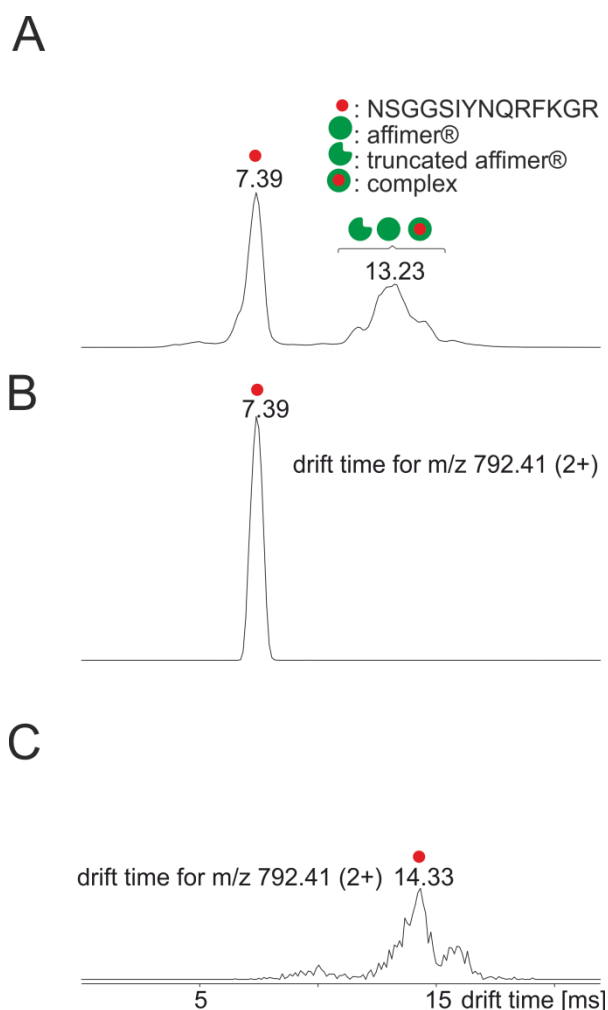

**Figure S10:** Ion mobility drift time plot of the NSGGSIIYNQRFKGR peptide incubated with the anti-Pertuzumab affimer 00557\_709097. The molar ratio of anti-Pertuzumab affimer 00557\_709097 to the NSGGSIIYNQRFKGR peptide was 1 to 2. Drift times are given for ions from the anti-Pertuzumab affimer 00557\_709097 (monomeric full-length affimer (green filled circle, **I**), the dimeric full-length affimer (green filled circle tandem, **II**), and the monomeric truncated affimer (green filled circle with rectangular cutout, **III**), and for peptide NSGGSIIYNQRFKGR (amino acid range 54-67 from Pertuzumab heavy chain (HC); red filled circle). Complex ions are indicated with red filled circles centered within green filled circles. Traces were smoothed using the Savitzky Golay algorithm applying a smooth window of 2 channels and 2 smooth cycles. **A:** Drift time plot for all ions at Transfer collision cell voltage difference of 2V. **B:** Drift time plot for ion with m/z value of 792.41 (doubly protonated peptide NSGGSIIYNQRFKGR) at Transfer collision cell voltage difference of 2 V. **C:** Drift time plot for ion with m/z value 792.41 at Transfer collision cell voltage difference of 75 V.

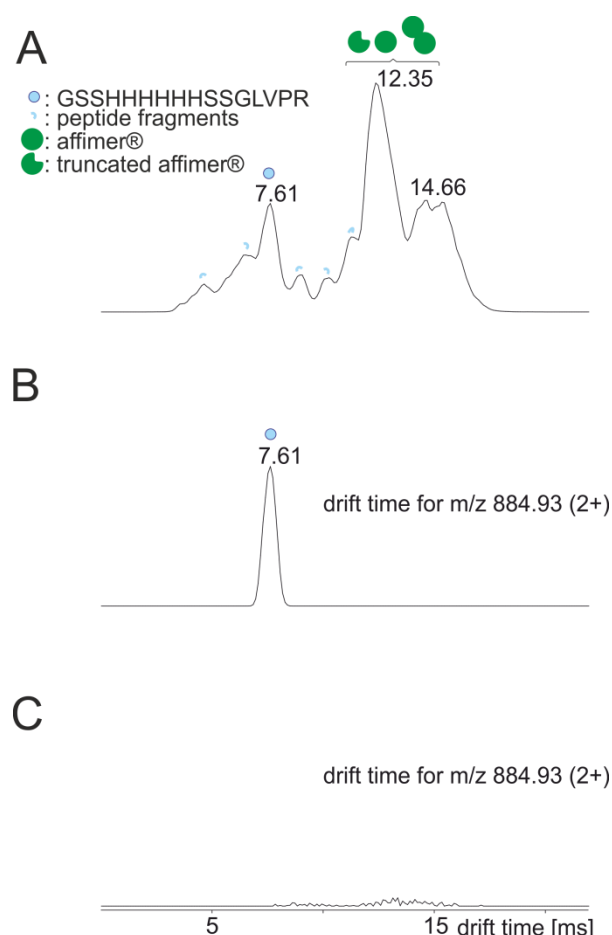

**Figure S11:** Ion mobility drift time plot of the GSSHHHHHHHGLVPR His-tag peptide incubated with the anti-Pertuzumab affimer 00557\_709097. The molar ratio of anti-Pertuzumab affimer 00557\_709097 to the GSSHHHHHHHGLVPR peptide was 1 to 2. Drift times are given for ions from the anti-Pertuzumab affimer 00557\_709097 (monomeric full-length affimer (green filled circle, **I**), the dimeric full-length affimer (green filled circle tandem, **II**), and the monomeric truncated affimer (green filled circle with rectangular cutout, **III**), and for the His-tag peptide GSSHHHHHHHGLVPR (light blue filled circle). Traces were smoothed using the Savitzky Golay algorithm applying a smooth window of 2 channels and 2 smooth cycles. **A:** Drift time plot for all ions at Transfer collision cell voltage difference of 2V. **B:** Drift time plot for ion with m/z value of 884.93 (doubly protonated His-tag peptide) at Transfer collision cell voltage difference of 2 V. **C:** Drift time plot for ion with m/z value 884.93 at Transfer collision cell voltage difference of 75 V.

## Supplemental Tables

**Table S1:** Ion charge states, m/z values, intensities, and experimentally determined molecular masses of the complex consisting of Pertuzumab with two affimer monomers (VI) <sup>a)</sup>.

| z       | m/z         | intensity <sup>b)</sup> | MW (exp.)        |
|---------|-------------|-------------------------|------------------|
| 31+     | 5661.47     | 1299                    | 175474.57        |
| 30+     | 5848.81     | 3761                    | 175434.30        |
| 29+     | 6051.06     | 4906                    | 175451.74        |
| 28+     | 6265.64     | 3968                    | 175409.92        |
| 27+     | 6499.06     | 2471                    | 175447.62        |
| 26+     | 6748.52     | 1292                    | 175435.52        |
| mean MW |             |                         | 175442.28 ± 21.5 |
| 28.6+   | mean charge |                         |                  |

a) determined at ΔCV 60; see figure 1.

b) arbitrary units

**Table S2:** Ion charge states, m/z values, intensities, and experimentally determined molecular masses of the complex consisting of Pertuzumab with one affimer monomer (V) <sup>a)</sup>.

| z       | m/z         | intensity <sup>b)</sup> | MW (exp.)         |
|---------|-------------|-------------------------|-------------------|
| 29+     | 5579.95     | 315                     | 161789.55         |
| 28+     | 5779.66     | 949                     | 161802.48         |
| 27+     | 5996.87     | 1577                    | 161888.49         |
| 26+     | 6224.83     | 1641                    | 161819.58         |
| 25+     | 6472.56     | 1075                    | 161789.00         |
| mean MW |             |                         | 161817.82 ± 41.42 |
| 26.6+   | mean charge |                         |                   |

a) determined at ΔCV 60; see figure 1.

b) arbitrary units

**Table S3:** Ion charge states, m/z values, intensities, and experimentally determined molecular masses of Pertuzumab (IV) <sup>a)</sup>.

| z       | m/z         | intensity <sup>b)</sup> | MW (exp.)         |
|---------|-------------|-------------------------|-------------------|
| 27+     | 5486.95     | 1084                    | 148120.65         |
| 26+     | 5697.99     | 2888                    | 148121.74         |
| 25+     | 5924.91     | 4306                    | 148097.75         |
| 24+     | 6172.40     | 3287                    | 148113.60         |
| 23+     | 6440.27     | 1437                    | 148103.21         |
| mean MW |             |                         | 148111.39 ± 10.62 |
| 24.9+   | mean charge |                         |                   |

a) determined at ΔCV 60; see figure 1.

b) arbitrary units

**Table S4:** Ion charge states, m/z values, intensities, and experimentally determined molecular masses of the affimer monomer (I) <sup>a)</sup>.

| z       | m/z         | intensity <sup>b)</sup> | MW (exp.)       |
|---------|-------------|-------------------------|-----------------|
| 12+     | 1138.12     | 515                     | 13645.44        |
| 11+     | 1241.44     | 1944                    | 13644.84        |
| 10+     | 1365.54     | 4257                    | 13645.40        |
| 9+      | 1517.22     | 11524                   | 13645.98        |
| 8+      | 1706.67     | 4077                    | 13645.36        |
| 7+      | 1950.56     | 689                     | 13646.92        |
| mean MW |             |                         | 13645.66 ± 0.72 |
| 9.2+    | mean charge |                         |                 |

a) determined at ΔCV 60; see figure 1.

b) arbitrary units

**Table S5:** Ion charge states, m/z values, intensities, and experimentally determined molecular masses of the affimer dimer (II) <sup>a)</sup>.

| z       | m/z         | intensity <sup>b)</sup> | MW (exp.)       |
|---------|-------------|-------------------------|-----------------|
| 21+     | 1301.16     | 314                     | 27303.36        |
| 20+     | 1365.54     | 4257                    | 27290.80        |
| 19+     | 1437.41     | 5229                    | 27291.79        |
| 18+     | 1517.22     | 11524                   | 27291.96        |
| 17+     | 1606.40     | 5798                    | 27291.80        |
| 16+     | 1706.67     | 4077                    | 27290.72        |
| 15+     | 1820.50     | 1301                    | 27292.50        |
| 14+     | 1950.56     | 689                     | 27293.84        |
| 13+     | 2100.49     | 215                     | 27293.37        |
| mean MW |             |                         | 27293.35 ± 3.89 |
| 17.8+   | mean charge |                         |                 |

a) determined at  $\Delta CV$  60; see figure 1.

b) arbitrary units

**Table S6:** Ion charge states, m/z values, intensities, and experimentally determined molecular masses of the truncated affimer monomer (III) <sup>a)</sup>.

| z       | m/z         | intensity <sup>b)</sup> | MW (exp.)    |
|---------|-------------|-------------------------|--------------|
| 9+      | 1379.28     | 1907                    | 12404.52     |
| 8+      | 1551.63     | 1799                    | 12405.04     |
| 7+      | 1773.10     | 1021                    | 12404.70     |
| 6+      | 2068.62     | n.d.                    | 12405.72     |
| mean MW |             |                         | 12405 ± 0.53 |
| 8.2+    | mean charge |                         |              |

a) determined at  $\Delta CV$  60; see figure 1.

b) arbitrary units

**Table S7:** Ion charge states, m/z values, intensities, and experimentally determined molecular masses of the truncated affimer dimer (VII) <sup>a)</sup>.

| z       | m/z         | intensity <sup>b)</sup> | MW (exp.)       |
|---------|-------------|-------------------------|-----------------|
| 13+     | 1810.49     | 601                     | 23523.37        |
| 12+     | 1961.33     | 993                     | 23523.96        |
| 11+     | 2139.34     | 615                     | 23521.74        |
| 10+     | 2353.27     | 204                     | 23522.70        |
| mean MW |             |                         | 23522.94 ± 0.95 |
| 12.0+   | mean charge |                         |                 |

a) determined at  $\Delta CV$  60; see figure 1.

b) arbitrary units

**Table S8:** Protein ion intensities at measured collision cell voltage differences for measurement 1 of affimer 00557\_709097 incubated with Pertuzumab.

| $\Delta CV$<br>[V] | protein / complex <sup>a)</sup> |                           |                               |                          |                    |                                          |                                            |
|--------------------|---------------------------------|---------------------------|-------------------------------|--------------------------|--------------------|------------------------------------------|--------------------------------------------|
|                    | truncated<br>affimer<br>(III)   | affimer<br>monomer<br>(I) | Truncated<br>affimer<br>dimer | affimer<br>dimer<br>(II) | Pertuzumab<br>(IV) | Pertuzumab +<br>1 affimer<br>monomer (V) | Pertuzumab +<br>2 affimer<br>monomers (VI) |
| 2                  | n.d. <sup>b)</sup>              | n.d. <sup>b)</sup>        | n.d. <sup>b)</sup>            | n.d. <sup>b)</sup>       | 22552              | 21081                                    | 30186                                      |
| 15                 | n.d. <sup>b)</sup>              | 8139                      | n.d. <sup>b)</sup>            | n.d. <sup>b)</sup>       | 229453             | 123367                                   | 332028                                     |
| 20                 | n.d. <sup>b)</sup>              | 22587                     | n.d. <sup>b)</sup>            | n.d. <sup>b)</sup>       | 167207             | 89045                                    | 321265                                     |
| 30                 | n.d. <sup>b)</sup>              | 42133                     | n.d. <sup>b)</sup>            | n.d. <sup>b)</sup>       | 348814             | 229900                                   | 564774                                     |
| 40                 | 23168                           | 90148                     | n.d. <sup>b)</sup>            | 83558                    | 320631             | 201844                                   | 602885                                     |
| 50                 | 32056                           | 245825                    | 66346                         | 380966                   | 401136             | 209145                                   | 618865                                     |
| 60                 | 58626                           | 452034                    | 114632                        | 1295660                  | 579104             | 189812                                   | 575729                                     |
| 70                 | 107447                          | 670342                    | 191239                        | 2230785                  | 706622             | 220437                                   | 727978                                     |
| 80                 | 182994                          | 824306                    | 226235                        | 3590127                  | 699719             | 164376                                   | 670724                                     |
| 90                 | 229833                          | 1036196                   | 260373                        | 4494586                  | 696721             | 246100                                   | 965194                                     |

a) Roman numerals according to Figure 1. Unitless number.

b) n.d.: not determined, ion signal not present

**Table S9:** Protein ion intensities at measured collision cell voltage differences for measurement 2 of affimer 00557\_709097 incubated with Pertuzumab.

| $\Delta CV$<br>[V] | protein/complex <sup>a)</sup> |                           |                               |                          |                    |                                          |                                            |
|--------------------|-------------------------------|---------------------------|-------------------------------|--------------------------|--------------------|------------------------------------------|--------------------------------------------|
|                    | truncated<br>affimer<br>(III) | affimer<br>monomer<br>(I) | truncated<br>affimer<br>dimer | affimer<br>dimer<br>(II) | Pertuzumab<br>(IV) | Pertuzumab +<br>1 affimer<br>monomer (V) | Pertuzumab +<br>2 affimer<br>monomers (VI) |
| 2                  | n.d. <sup>b)</sup>            | n.d. <sup>b)</sup>        | n.d. <sup>b)</sup>            | n.d. <sup>b)</sup>       | 48994              | 23576                                    | 80580                                      |
| 15                 | n.d. <sup>b)</sup>            | 14593                     | n.d. <sup>b)</sup>            | 26946                    | 1092293            | 297775                                   | 1880182                                    |
| 20                 | n.d. <sup>b)</sup>            | 20021                     | n.d. <sup>b)</sup>            | 35657                    | 552054             | 474910                                   | 1063679                                    |
| 30                 | n.d. <sup>b)</sup>            | 43543                     | n.d. <sup>b)</sup>            | 35248                    | 722351             | 313323                                   | 2203527                                    |
| 40                 | 36412                         | 220384                    | 29058                         | 141521                   | 1048765            | 444582                                   | 1297011                                    |
| 50                 | 133824                        | 485989                    | 64991                         | 921088                   | 1563516            | 327095                                   | 2293527                                    |
| 60                 | 176522                        | 970922                    | 143105                        | 2662213                  | 1331230            | 419534                                   | 1738065                                    |
| 70                 | 65567                         | 1494501                   | 206241                        | 4765817                  | 2362325            | 496962                                   | 3263791                                    |
| 80                 | 116800                        | 1683159                   | 260781                        | 7400605                  | 2459131            | 359917                                   | 1672313                                    |
| 90                 | 92502                         | 1868824                   | 279150                        | 9037523                  | 2473329            | 456793                                   | 1661711                                    |

a) Roman numerals according to Figure 1. Unitless number. b) n.d.: not determined, ion signal not present

**Table S10:** Assigned Pertuzumab peptide ions upon tryptic digestion and desalting and unassigned peptide ion signals <sup>a)</sup>.

| m/z (exp.) / z     | m/z (calc.) / z            | amino acid range <sup>b)</sup> | partial sequence           |
|--------------------|----------------------------|--------------------------------|----------------------------|
| 941.50 / 2+        | 941.51 / 2+                | HC 1-19                        | EVQLVESGGGLVQPGGSLR        |
| 952.48 / 2+        | 952.51 / 2+                | HC 1-19 + Na                   | EVQLVESGGGLVQPGGSLR        |
| 1088.51 / 2+       | 1088.52 / 2+               | HC 44-63                       | GLEWVADVNPNSGGSIYNQR       |
| 1099.51 / 2+       | 1099.52 / 2+               | HC 44-63 + Na                  | GLEWVADVNPNSGGSIYNQR       |
| <b>837.44 / 1+</b> | <b>837.45 / 1+</b>         | <b>HC 68-74</b>                | <b>FTLSVDR</b>             |
| 1186.65 / 1+       | 1186.68 / 1+ <sup>c)</sup> | HC 124-135                     | GPSVFPLAPSSK               |
| 661.34 / 2+        | 661.36 / 2+ <sup>c)</sup>  | HC 136-149                     | STSGGTAALGCLVK             |
| 1321.68 / 1+       | 1321.71 / 1+ <sup>c)</sup> | HC 136-149                     | STSGGTAALGCLVK             |
| 1422.73 / 2+       | 1422.76 / 2+ <sup>c)</sup> | HC 225-250                     | THTCPPCPAPELLGGPSVFLFPPKPK |
| 835.43 / 1+        | 835.43 / 1+                | HC 251-257                     | DTLMISR                    |
| 1070.00 / 2+       | 1070.02 / 2+               | HC 258-276                     | TPEVTCVVVDVSHEDPEVK        |
| 1080.99 / 2+       | 1081.02 / 2+               | HC 258-276 + Na                | TPEVTCVVVDVSHEDPEVK        |
| 839.40 / 2+        | 839.40 / 2+                | HC 277-290                     | FNWYVDGVEVHNAK             |
| 850.39 / 2+        | 850.40 / 2+                | HC 277-290 + Na                | FNWYVDGVEVHNAK             |
| 904.51 / 2+        | 904.51 / 2+                | HC 304-319                     | VVSVLTVLHQDWLNGK           |
| 838.50 / 1+        | 838.52 / 1+ <sup>c)</sup>  | HC 329-336                     | ALPAPIEK                   |
| 643.84 / 2+        | 643.85 / 2+ <sup>c)</sup>  | HC 347-357                     | EPQVYTLPPSR                |
| 1286.67 / 1+       | 1286.70 / 1+ <sup>c)</sup> | HC 347-357                     | EPQVYTLPPSR                |
| 1161.63 / 1+       | 1161.63 / 1+               | HC 363-372                     | NQVSLTCLVK                 |
| 1272.57 / 2+       | 1272.60 / 2+ <sup>c)</sup> | HC 373-394                     | GFYPDSIAVEWESNGQPENNYK     |
| 937.45 / 2+        | 937.46 / 2+                | HC 395-411                     | TTPPVLDSDGSFFLYSK          |
| 948.44 / 2+        | 948.46 / 2+                | HC 395-411 + Na                | TTPPVLDSDGSFFLYSK          |
| 660.36 / 1+        | 660.38 / 1+ <sup>c)</sup>  | HC 442-448                     | SLSLSPG                    |
| 939.95 / 2+        | 939.97 / 2+ <sup>c)</sup>  | LC 1-18                        | DIQMTQSPSSLSASVGDR         |
| 981.49 / 2+        | 981.51 / 2+                | LC 25-42                       | ASQDVSIQVAWYQQKPGK         |
| 1051.56 / 2+       | 1051.57 / 2+               | LC 108-126                     | RTVAAPSVFIFPPSDEQLK        |
| 973.51 / 2+        | 973.52 / 2+                | LC 109-126                     | TVAAPSVFIFPPSDEQLK         |
| 899.45 / 2+        | 899.45 / 2+                | LC 127-142                     | SGTASVVCLLNNFYP            |
| 560.32 / 1+        | 560.34 / 1+ <sup>c)</sup>  | LC 146-149                     | VQWK                       |
| 1068.47 / 2+       | 1068.49 / 2+               | LC 150-169                     | VDNALQSGNSQESVTEQDSK       |
| 1079.47 / 2+       | 1079.49 / 2+               | LC 150-169 + Na                | VDNALQSGNSQESVTEQDSK       |
| 1502.76 / 1+       | 1502.79 / 1+ <sup>c)</sup> | LC 170-183                     | DSTYSLSTLTLSK              |
| 938.47 / 2+        | 938.47 / 2+                | LC 191-207                     | VYACEVTHQGLSSPVTK          |
| 949.47 / 2+        | 949.47 / 2+                | LC 191-207 + Na                | VYACEVTHQGLSSPVTK          |
| 842.49 / 1+        | 842.51 / 1+                | Trypsin 108-115                | VATVSLPR                   |
| 869.50 / 1+        | n.a. <sup>d)</sup>         | n.a. <sup>d)</sup>             | n.a. <sup>d)</sup>         |
| 886.52 / 1+        | n.a. <sup>d)</sup>         | n.a. <sup>d)</sup>             | n.a. <sup>d)</sup>         |
| 913.51 / 1+        | n.a. <sup>d)</sup>         | n.a. <sup>d)</sup>             | n.a. <sup>d)</sup>         |
| 930.54 / 1+        | n.a. <sup>d)</sup>         | n.a. <sup>d)</sup>             | n.a. <sup>d)</sup>         |
| 960.46 / 2+        | n.a. <sup>d)</sup>         | n.a. <sup>d)</sup>             | n.a. <sup>d)</sup>         |
| 969.46 / 3+        | n.a. <sup>d)</sup>         | n.a. <sup>d)</sup>             | n.a. <sup>d)</sup>         |
| 1018.59 / 1+       | n.a. <sup>d)</sup>         | n.a. <sup>d)</sup>             | n.a. <sup>d)</sup>         |
| 1032.57 / 1+       | n.a. <sup>d)</sup>         | n.a. <sup>d)</sup>             | n.a. <sup>d)</sup>         |
| 1150.68 / 1+       | n.a. <sup>d)</sup>         | n.a. <sup>d)</sup>             | n.a. <sup>d)</sup>         |

a) see figure 3A. b) HC: heavy chain, LC: light chain c) spectrum not shown d) n.a.: not assigned

**Table S11:** Molecular information on synthetic peptides.

| peptide sequence       | amino acid range <sup>a)</sup> | m/z (calc.) / z | m/z (exp.) / z |
|------------------------|--------------------------------|-----------------|----------------|
| NSGGSIYNQRFKGR         | HC 54-67                       | 528.61 / 3+     | 528.59 / 3+    |
|                        |                                | 792.41 / 2+     | 792.38 / 2+    |
| FTLSVDR                | HC 68-74                       | 837.45 / 1+     | 837.42 / 1+    |
| NSGGSIYNQRFKGR FTLSVDR | HC 54-74                       | 801.42 / 3+     | 801.38 / 3+    |
|                        |                                | 1201.62 / 2+    | 1201.56 / 2+   |
| GSSHHHHHHSSGLVPR       | n.a. <sup>b)</sup>             | 590.29 / 3+     | 590.28 / 3+    |
|                        |                                | 884.93 / 2+     | 884.90 / 2+    |

a) HC: heavy chain.

b) not applicable.
